# Supplementary material for: Multi-environment ecogenomics analysis of the cosmopolitan phylum Gemmatimonadota
Source: PubMed Central journal article supplement (PMC10581226; doi:10.1128/spectrum.01112-23), 2023-09-21
Supplement: spectrum.01112-23-s0001.pdf [file spectrum.01112-23-s0001.pdf]

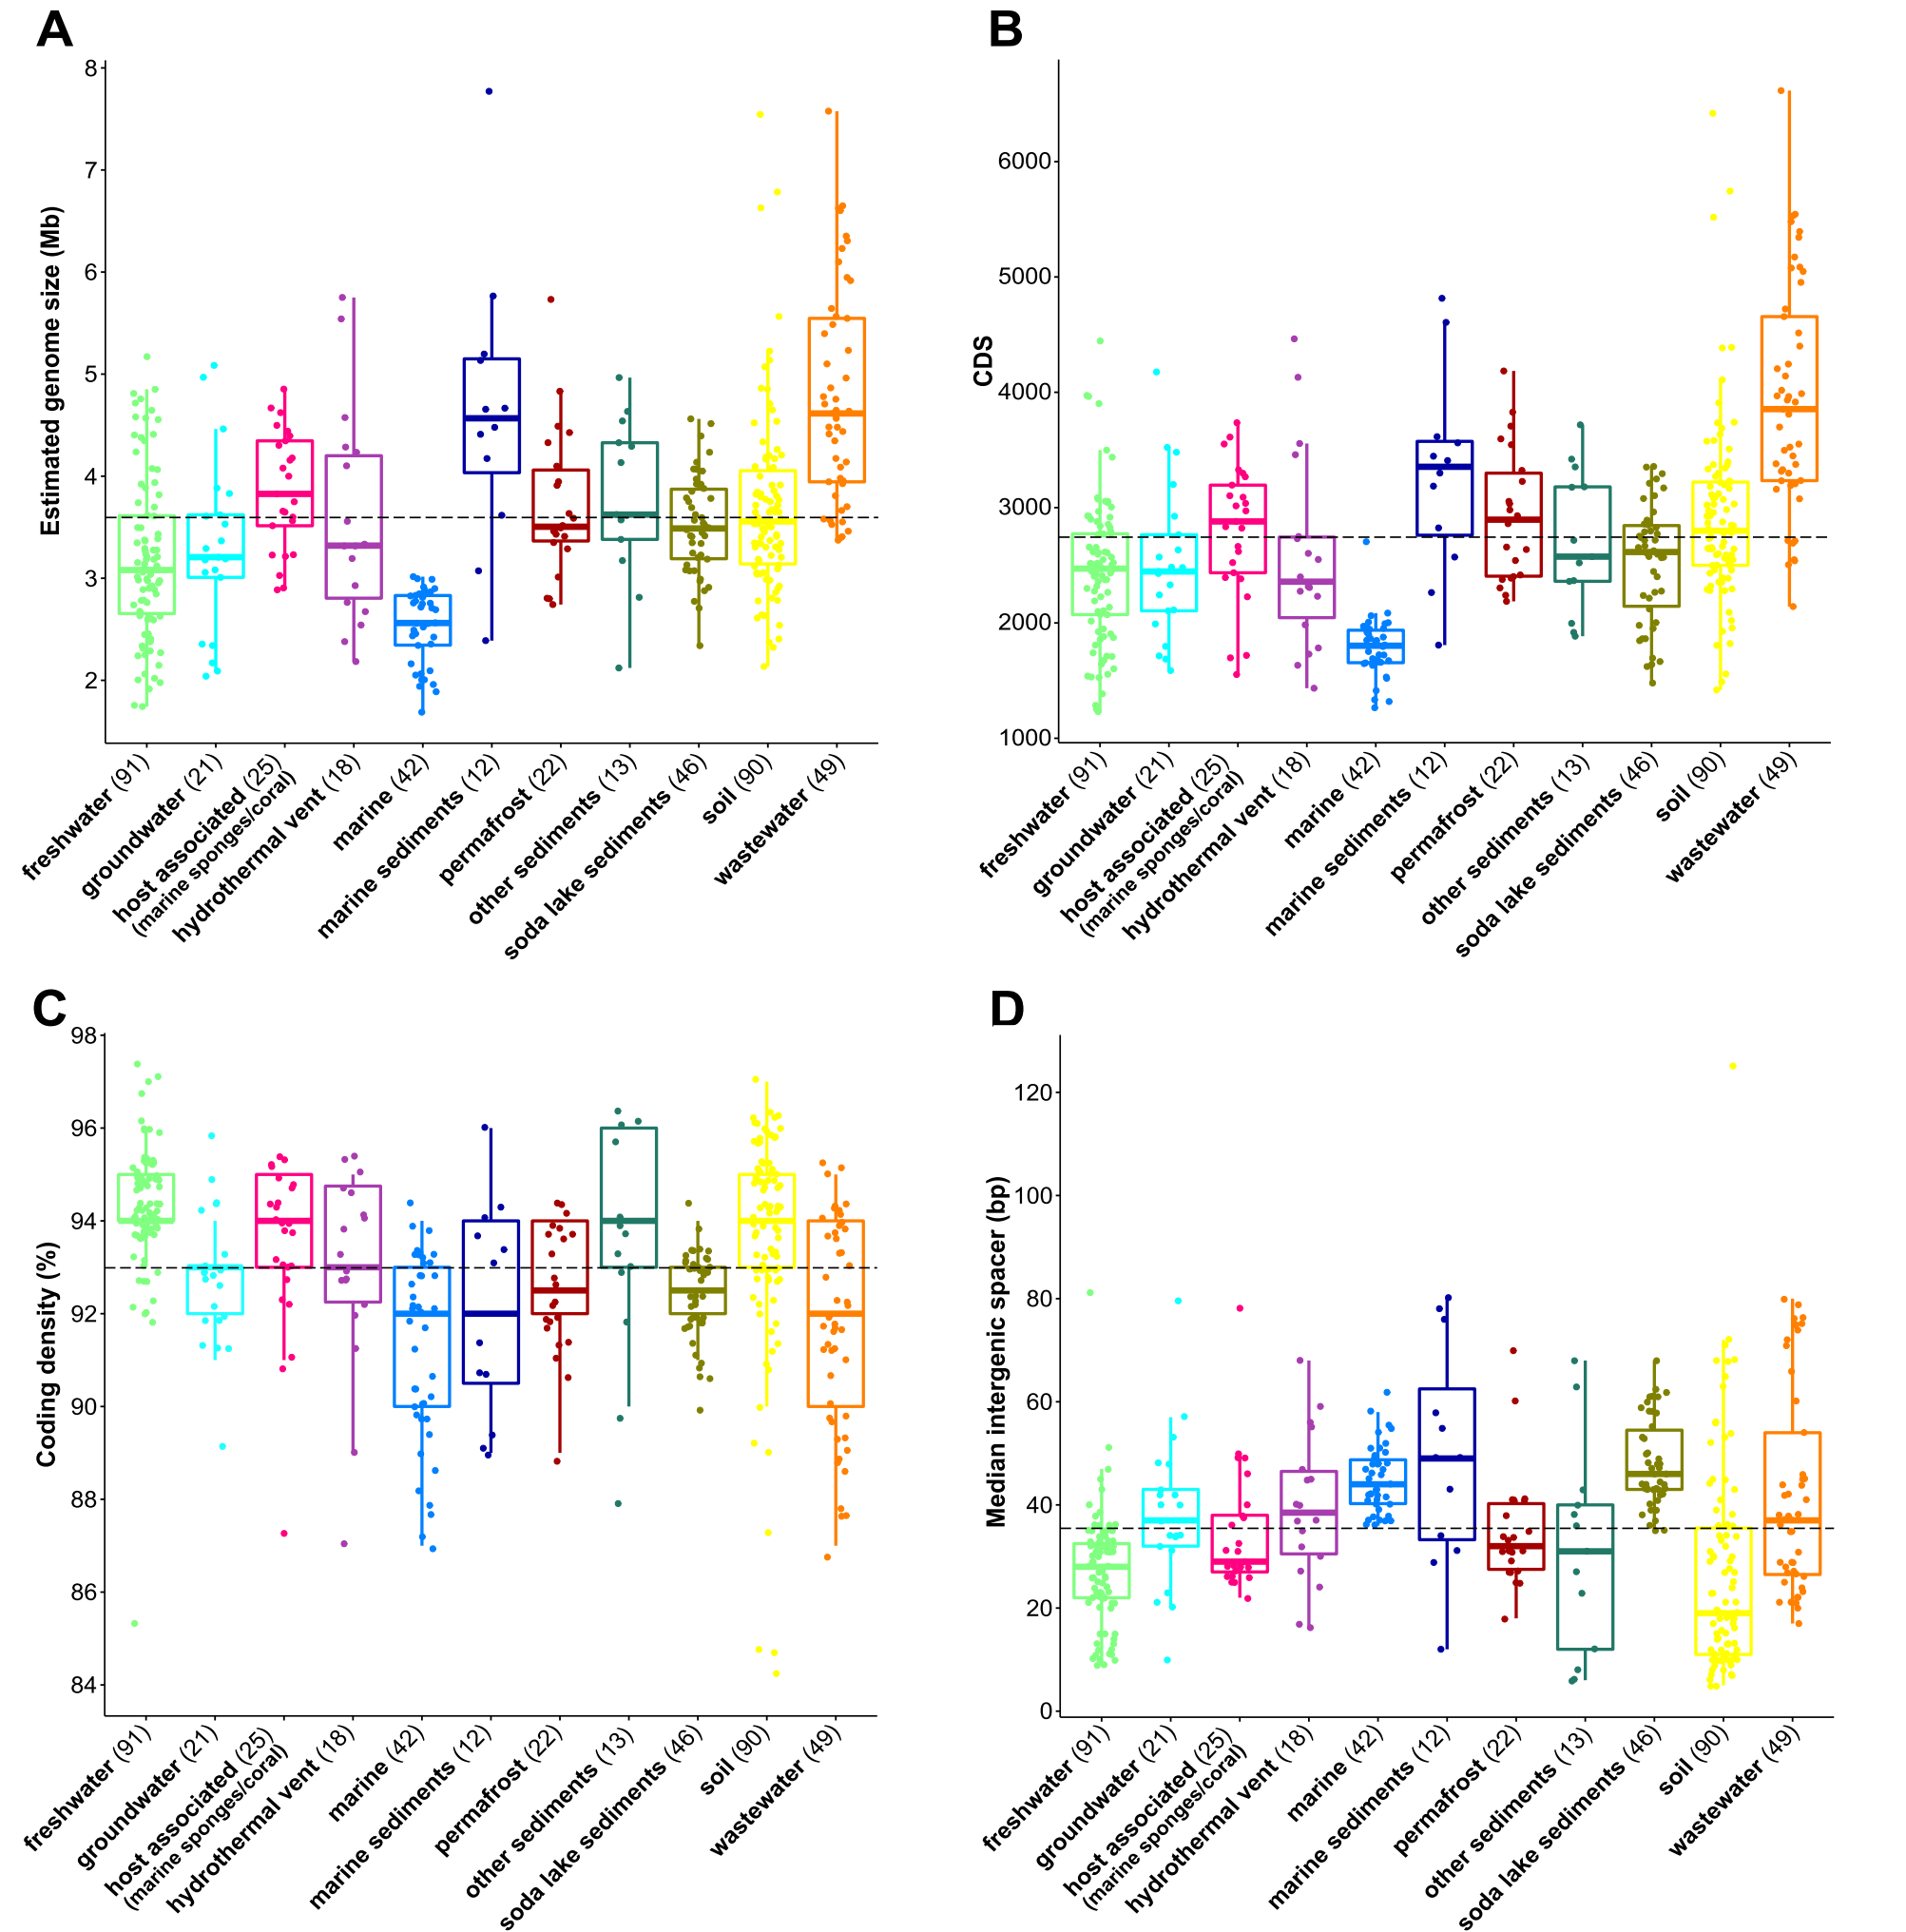

**Figure S1.** Basic characteristics of Gemmatimonadota genomes. Plots show **(A)** range of estimated genome sizes, **(B)** number of CDS, **(C)** ranges of coding density (%) and **(D)** ranges of median intergenic spacer (bp) of Gemmatimonadota genomes from different environments. Environments are color coded, and the number of genomes used in each environment is labeled.

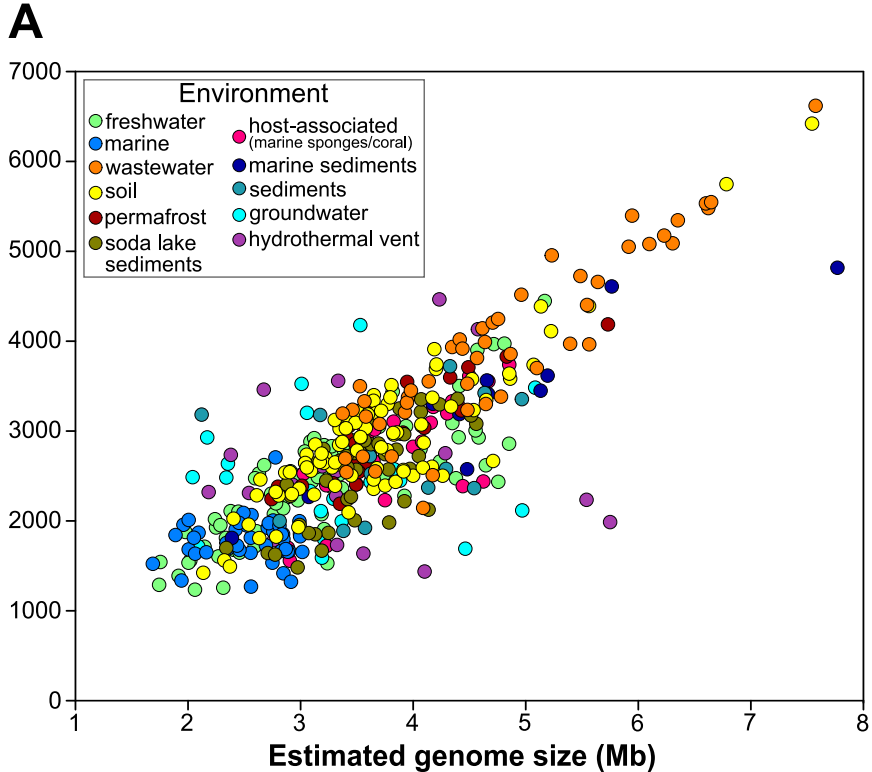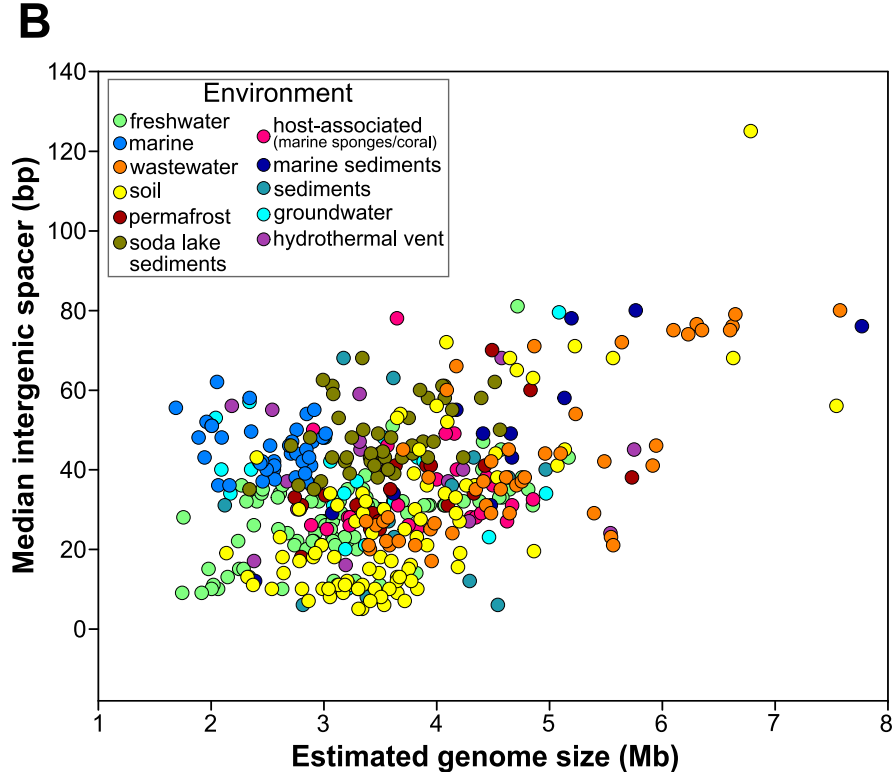

**Figure S2.** Coding density plots showing comparison of **(A)** CDS and **(B)** median intergenic spacer (bp) with the estimated genome size of Gemmatimonadota genomes from different environments color coded.

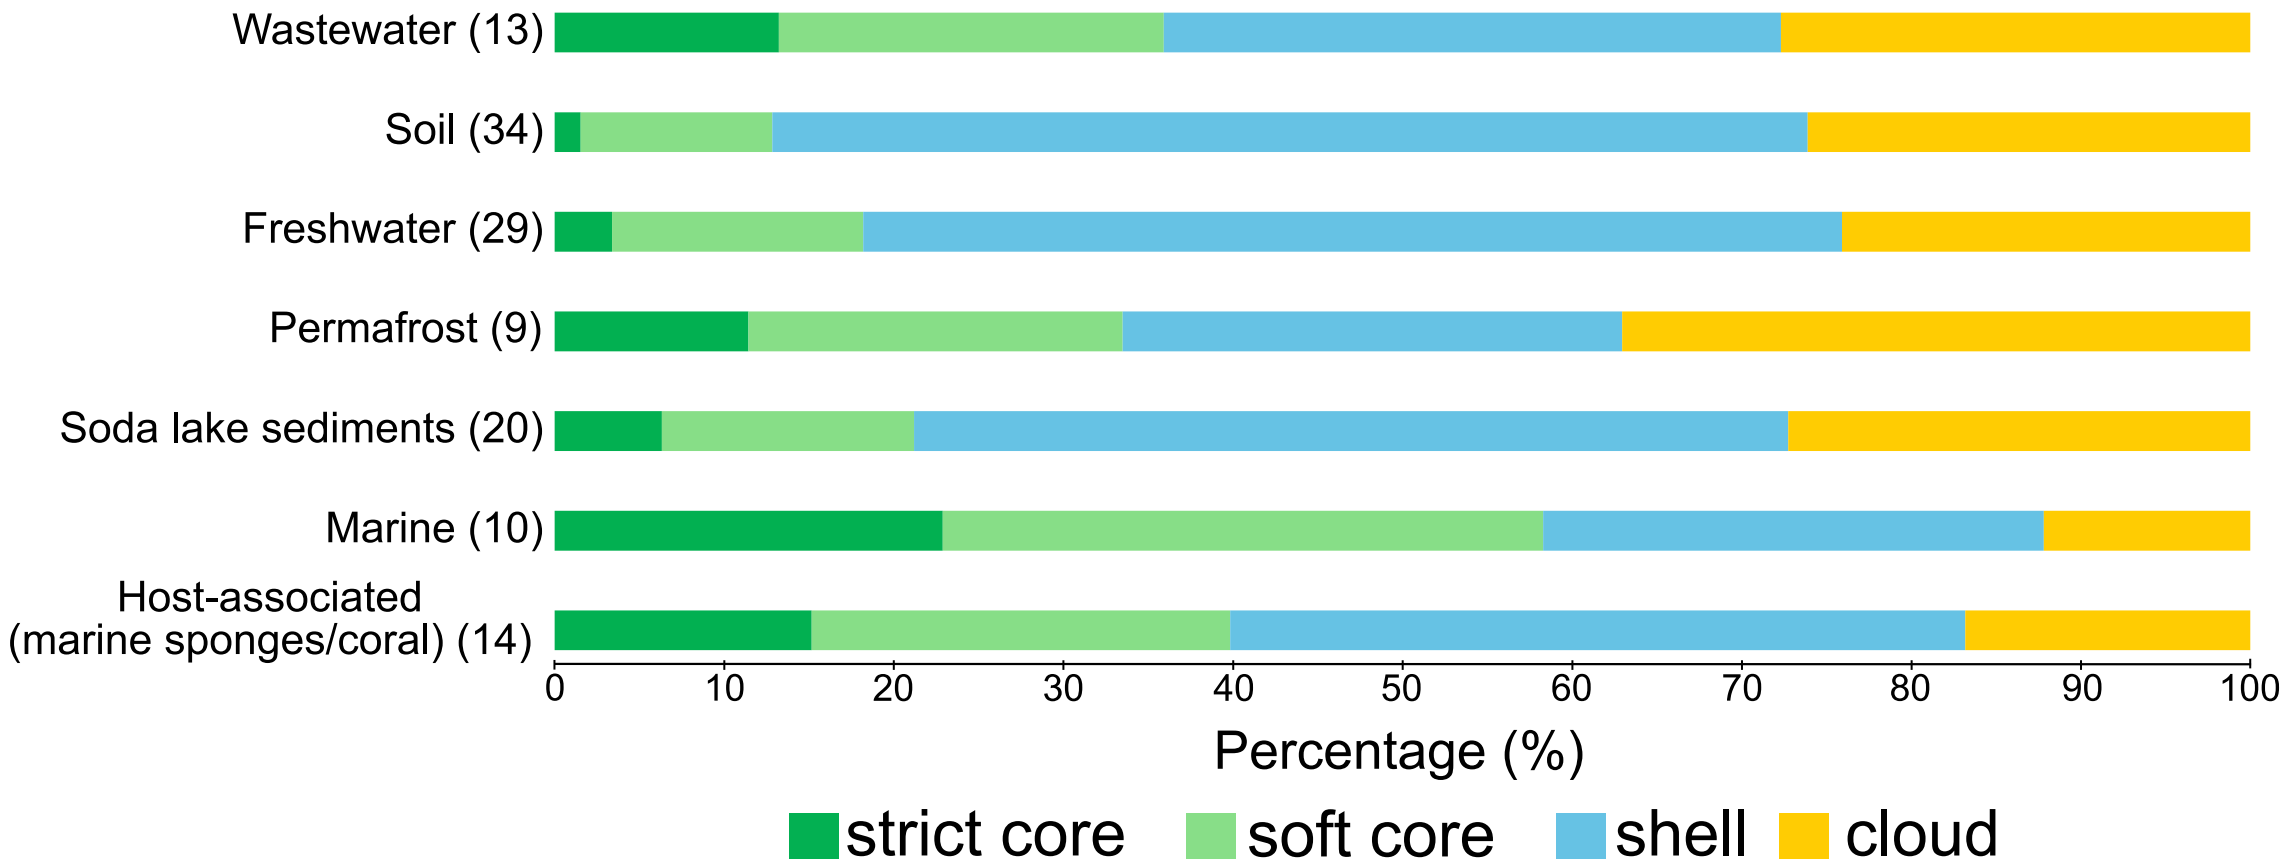

**Figure S3.** Habitat related core and accessory genes of Gemmatimonadota genomes from 7 environments showing percentage of genes forming strict core, soft core, cloud and shell part of the genomes.

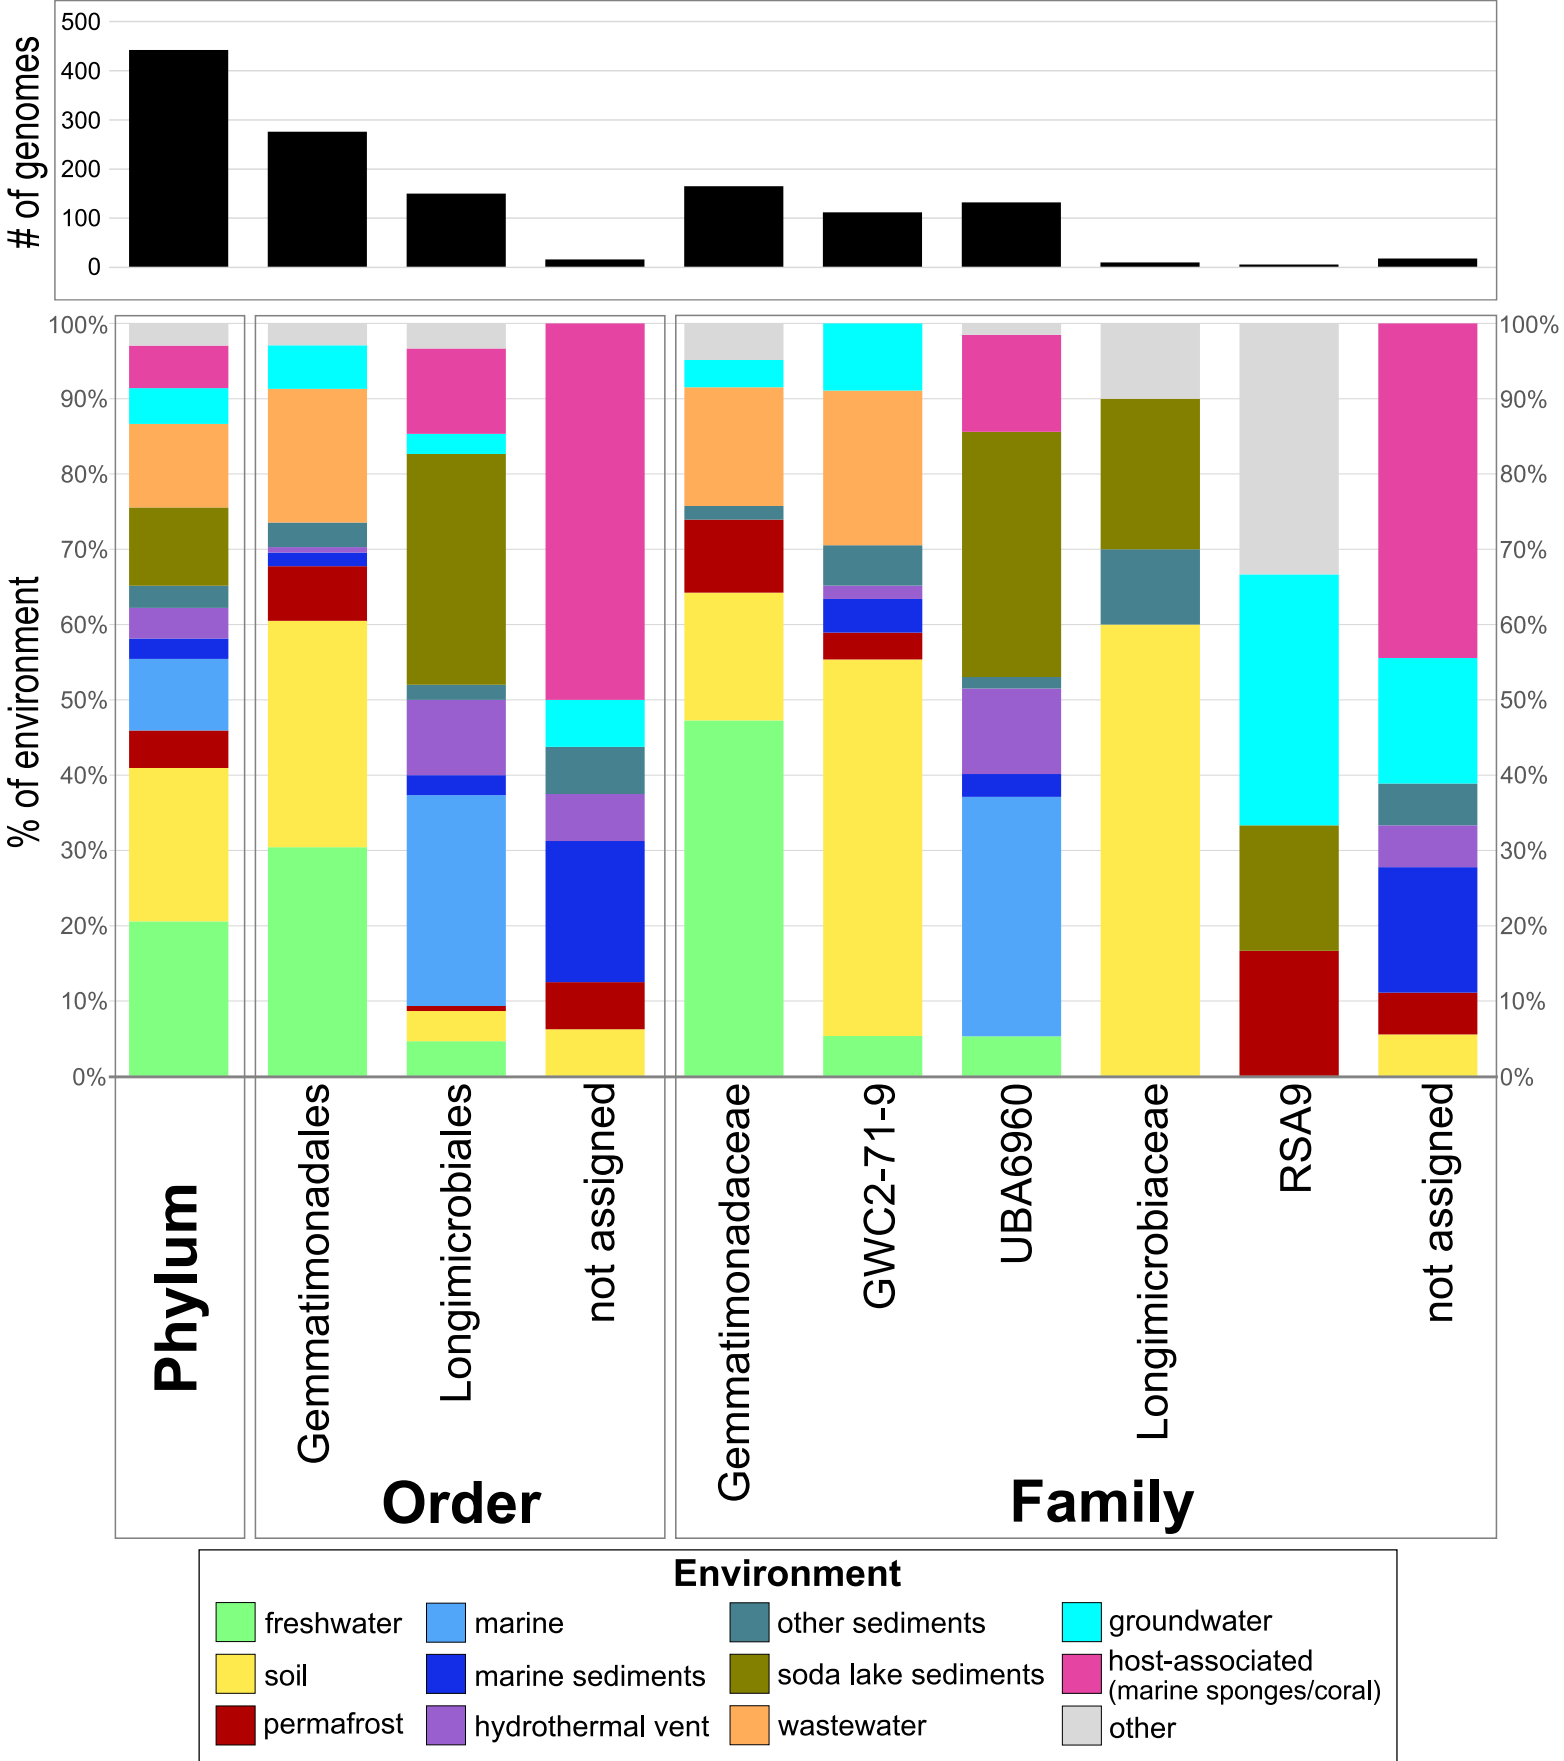

**Figure S4.** Environment related grouping of Gemmatimonadota on different taxonomic levels (phylum, family, order) based on taxonomic assignment by GTDB (101). Bottom legend shows color-coded environments from which the Gemmatimonadota genomes originate.

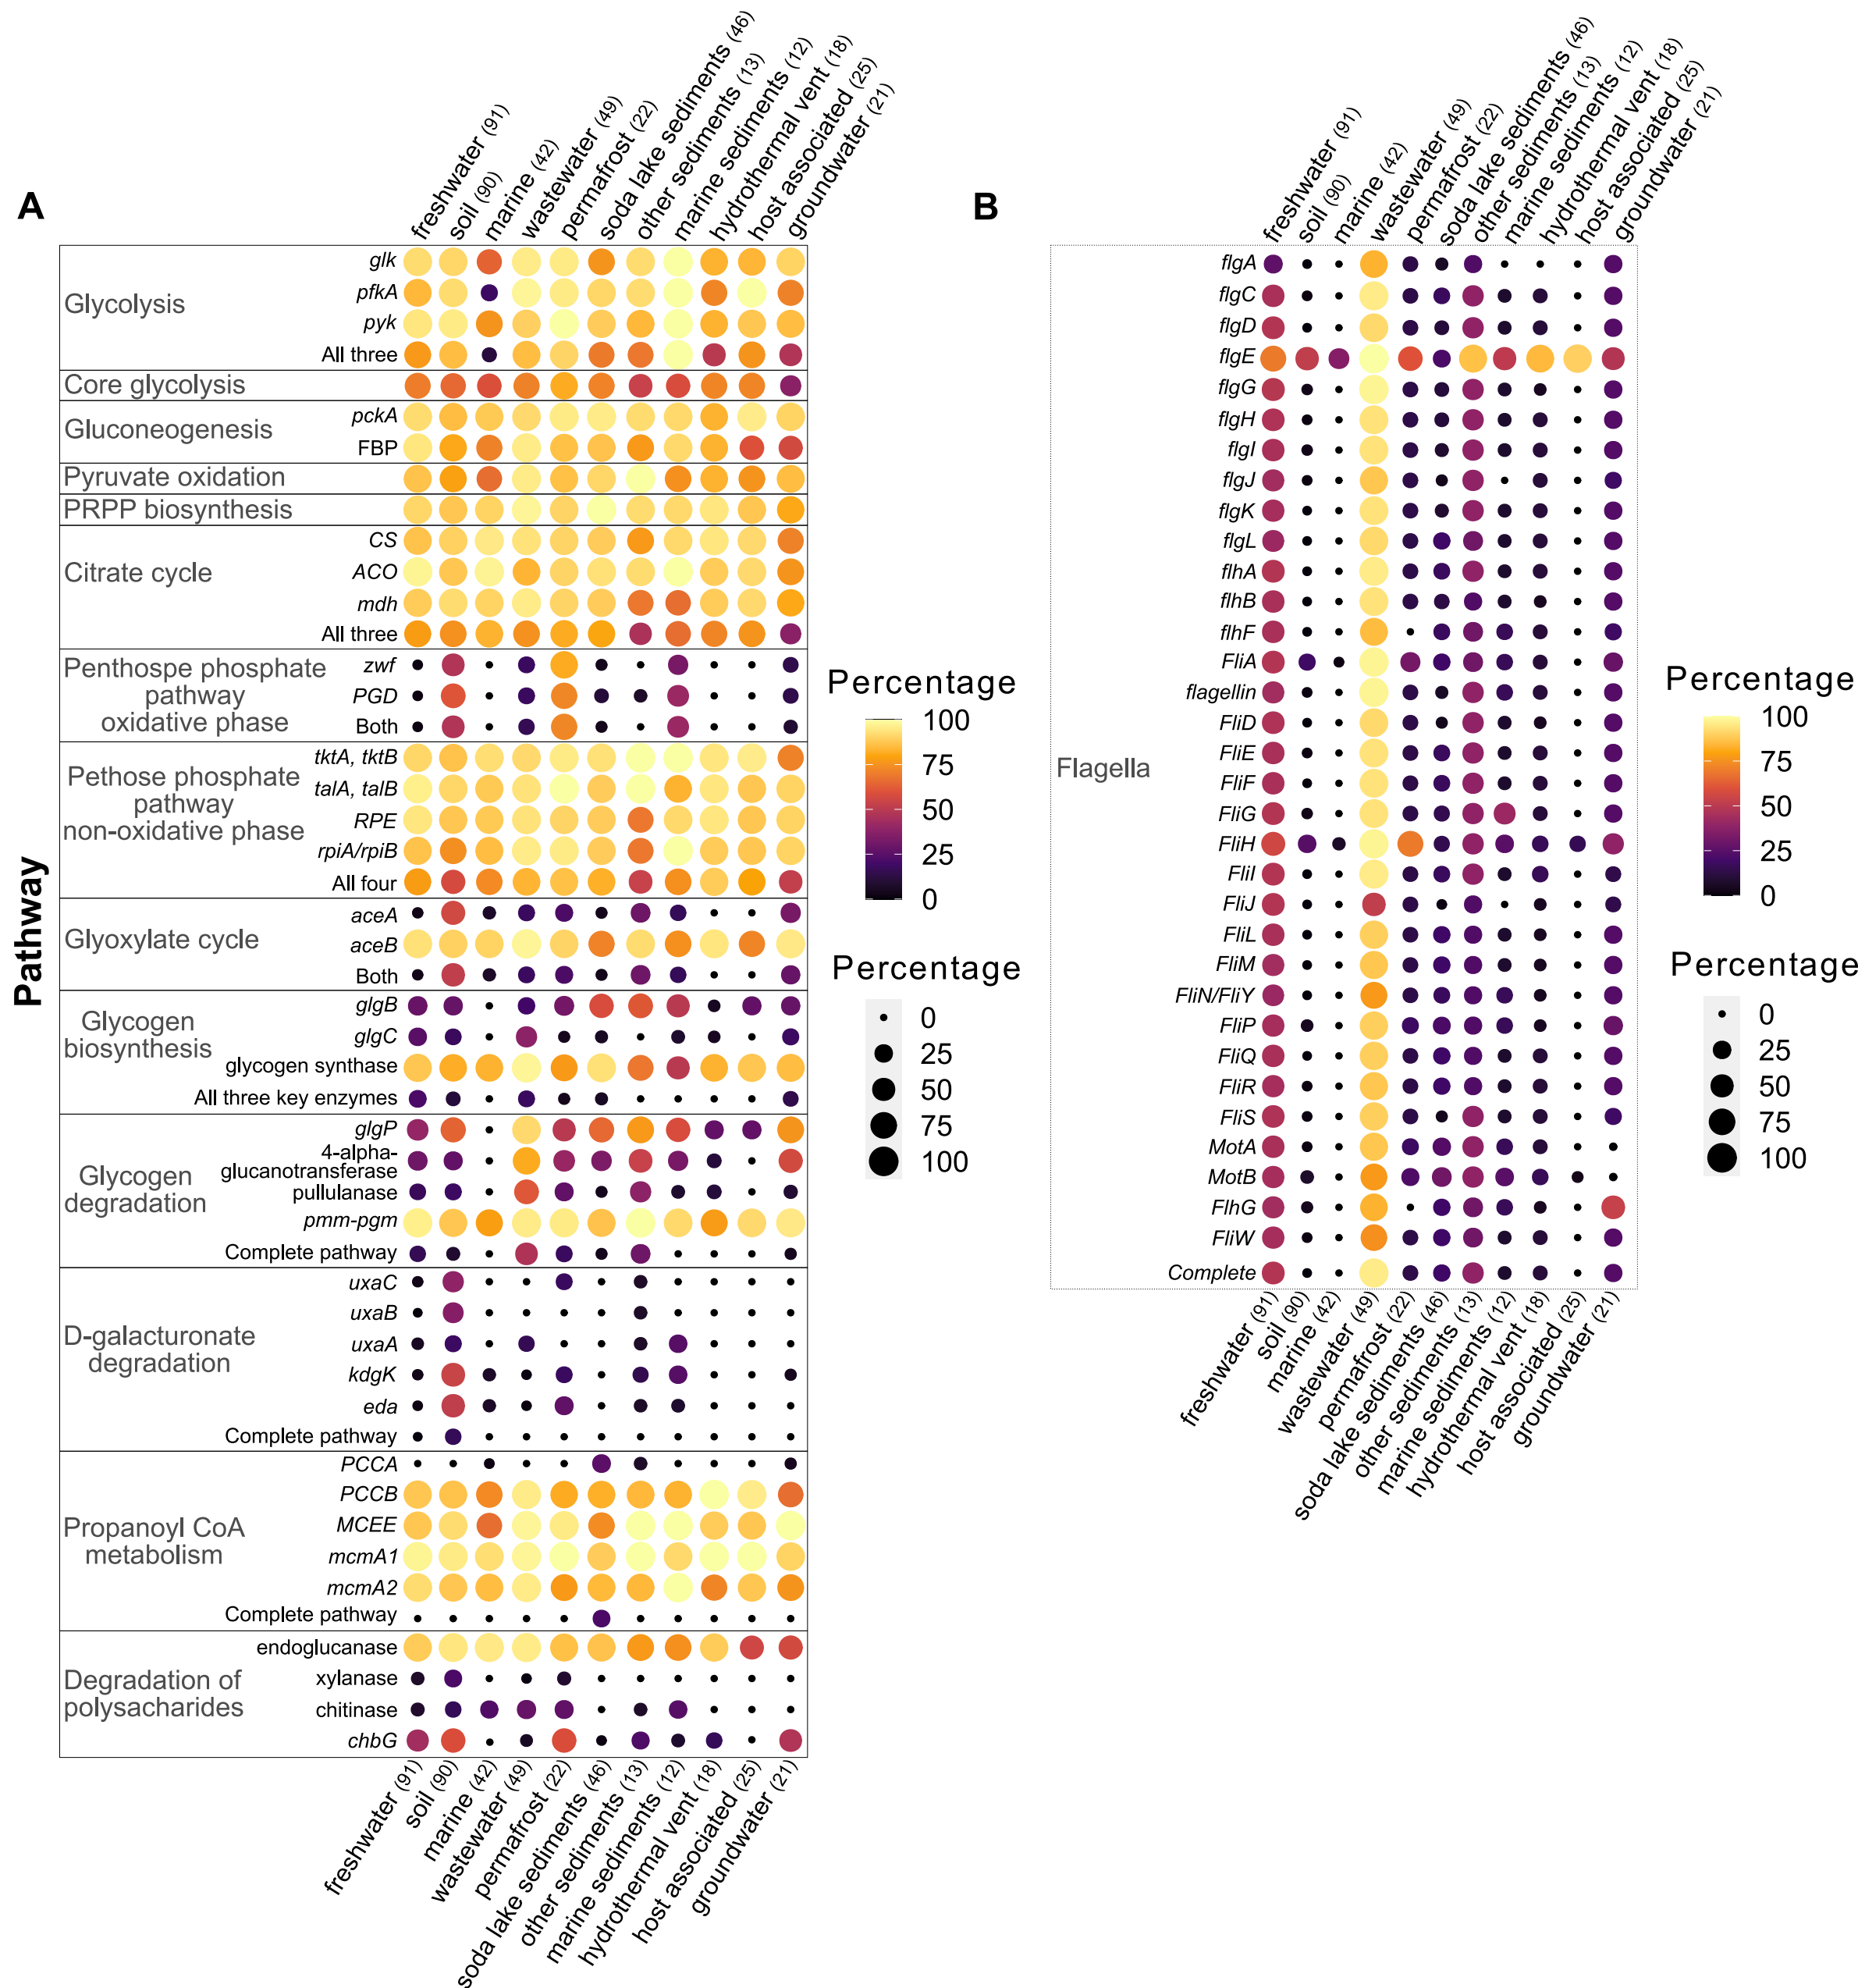



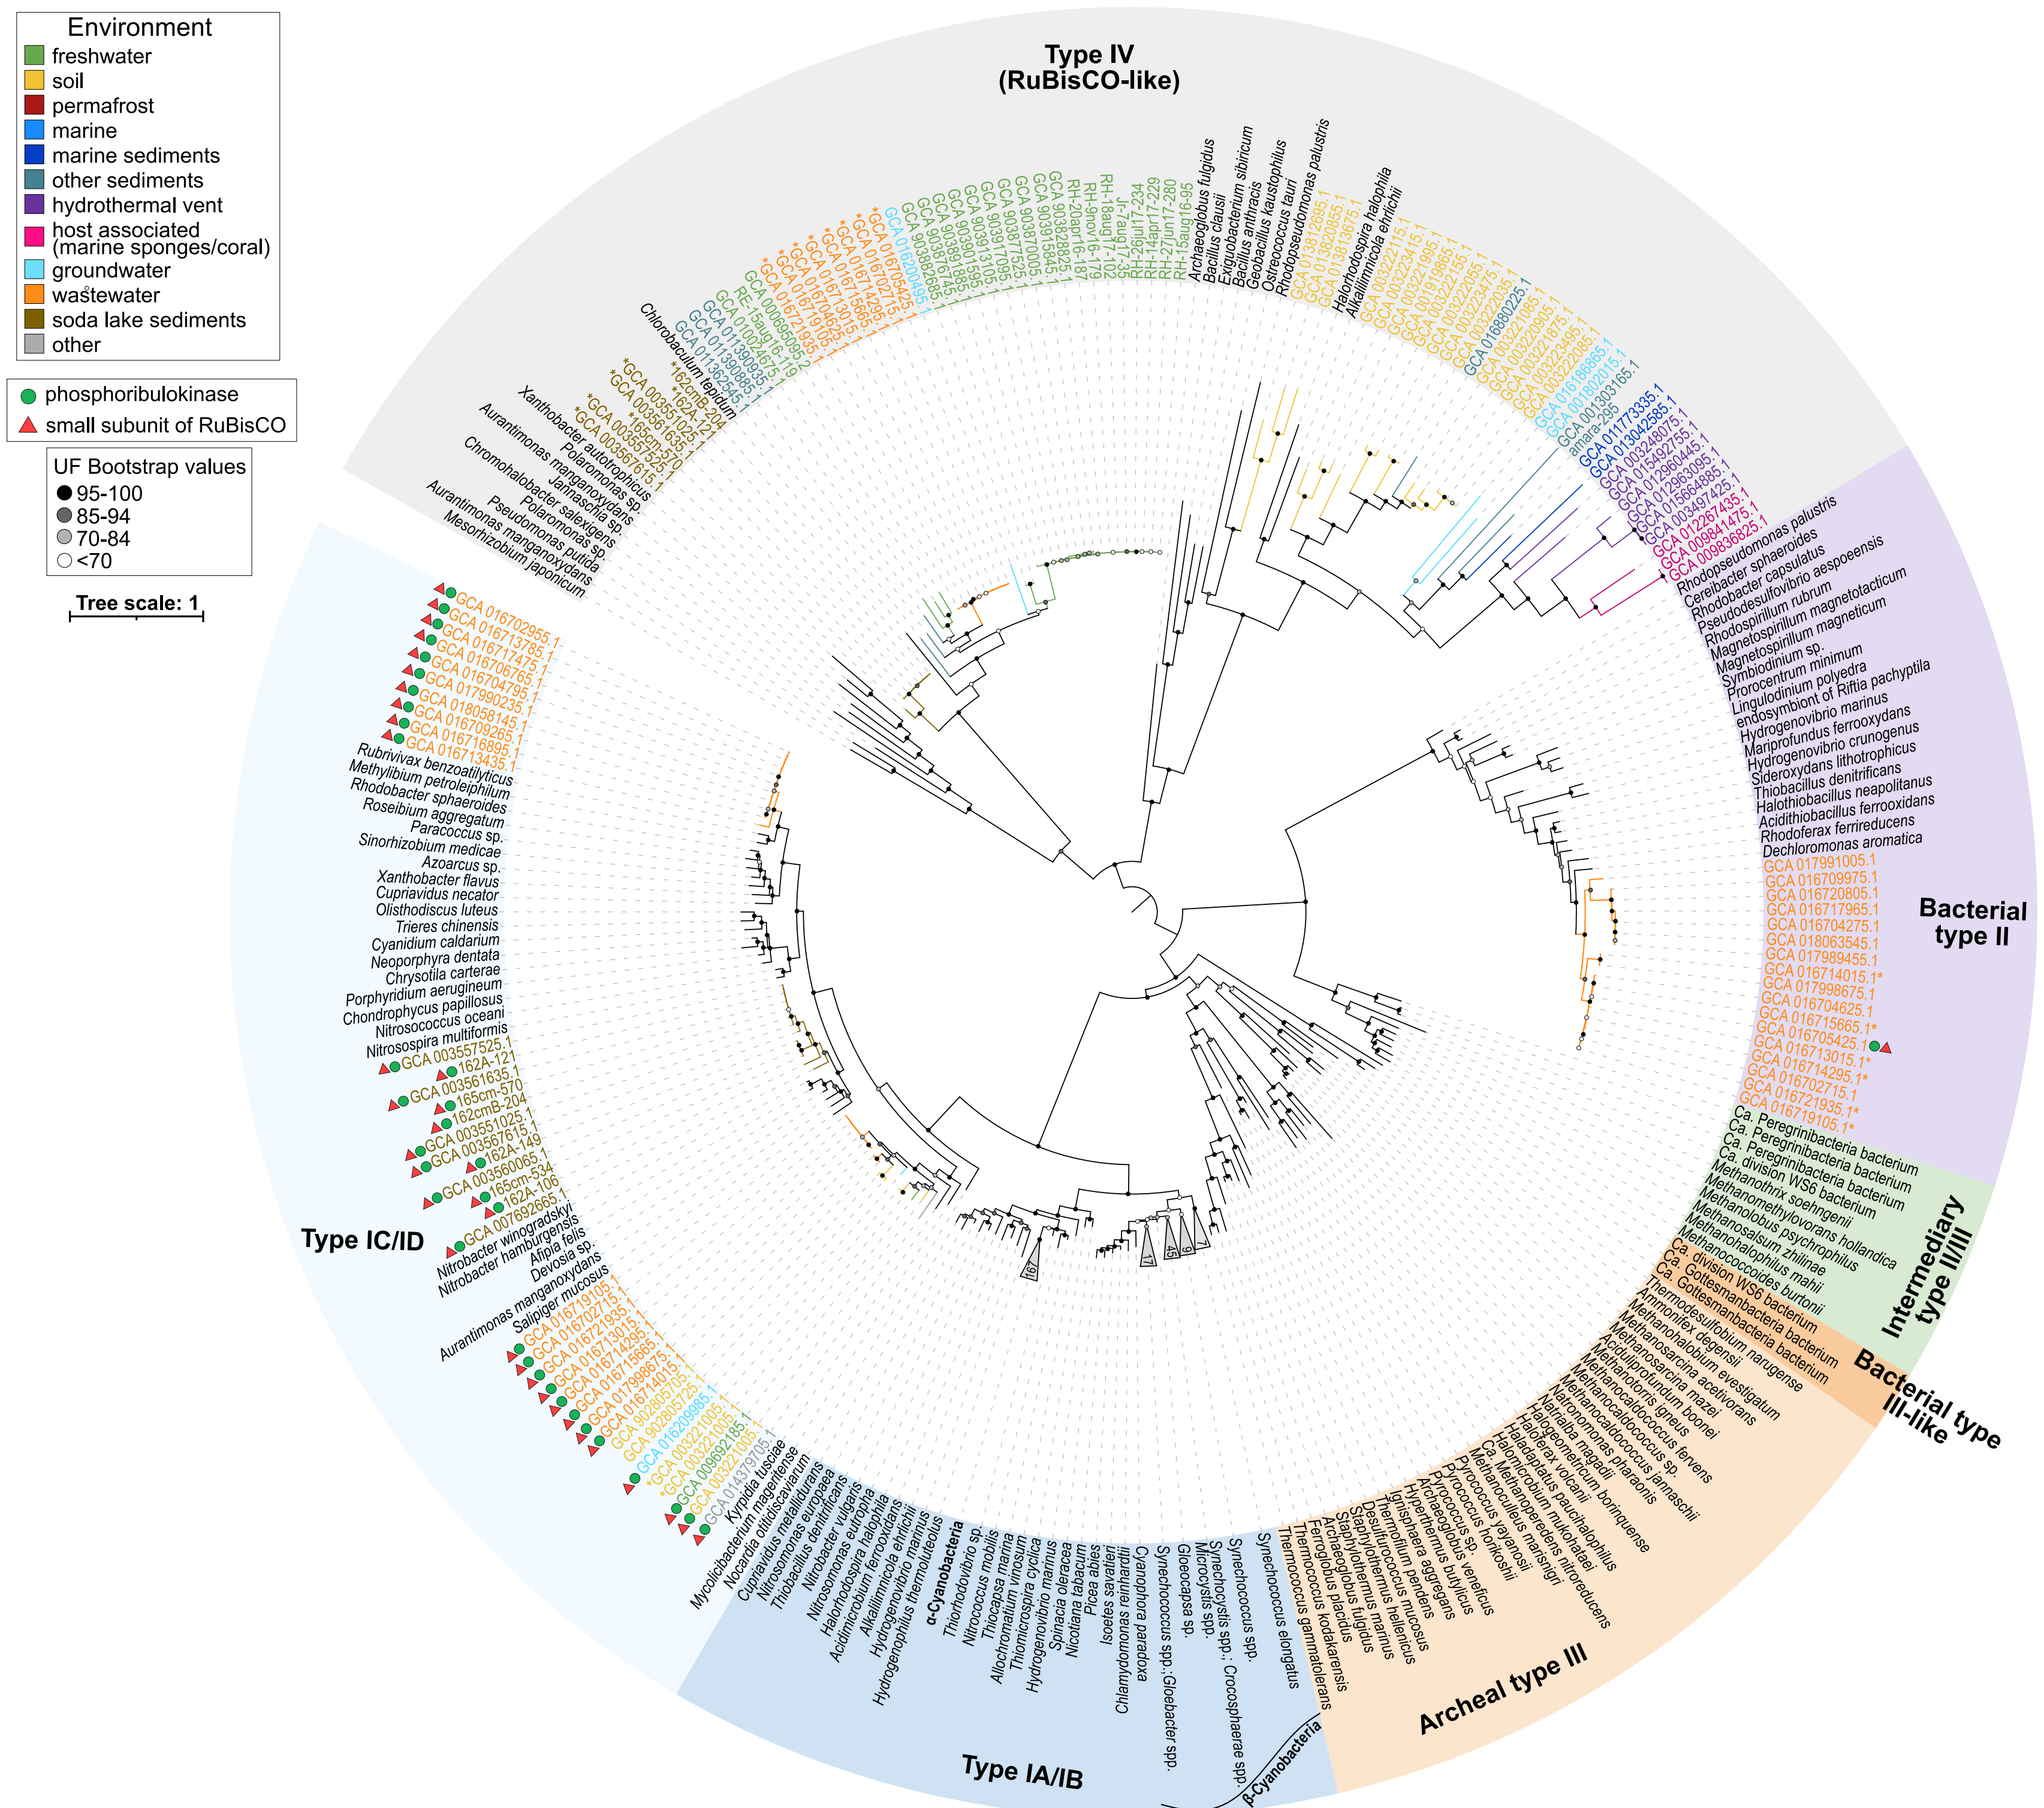

**Figure S6.** Maximum-likelihood phylogenetic tree with (LG+F+I+G4 substitution model chosen as the best-fitting model by ModelFinder according to Bayesian Information Criterion (BIC) (118) and 1000 ultrafast bootstrap replicates) of the large subunit of RuBisCO (types I-III) and RuBisCO like (type IV) proteins (*rbL*) showing position and classification of Gemmatimonadota RuBisCO sequences. Sequences are color coded based on environment of origin. The presence of small RuBisCO subunit (*rbS*) and phosphoribulokinase, is labeled with red triangle and green circle, respectively. The numbers shown at collapsed branches (i.e., 7 and 46) indicate the number of genomes (not shown) comprising the respective taxonomic categories.
